# Supplementary material for: State of art fusion-finder algorithms are suitable to detect transcription-induced chimeras in normal tissues?
Source: Springer Nature journal article supplement (doi:10.1186/1471-2105-14-s7-s2), 2013-04-01

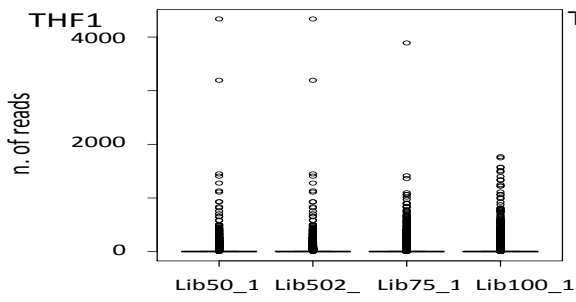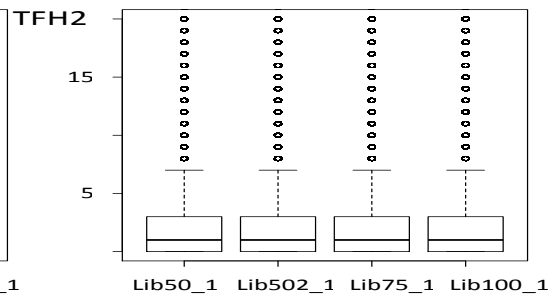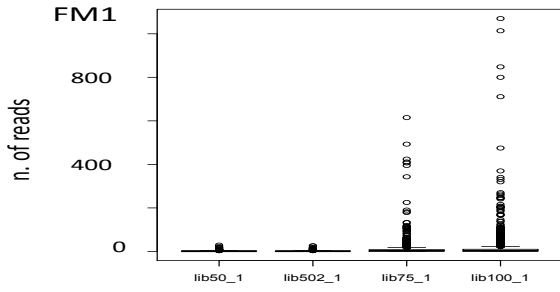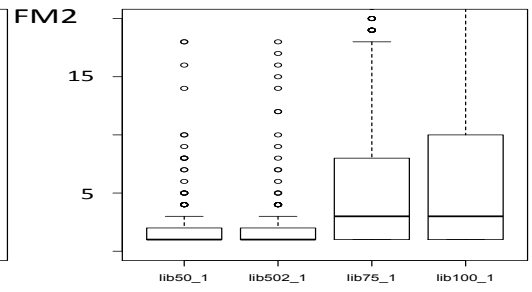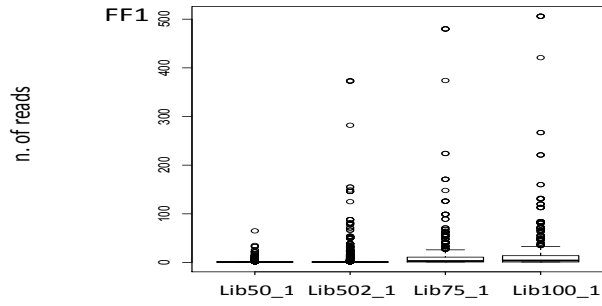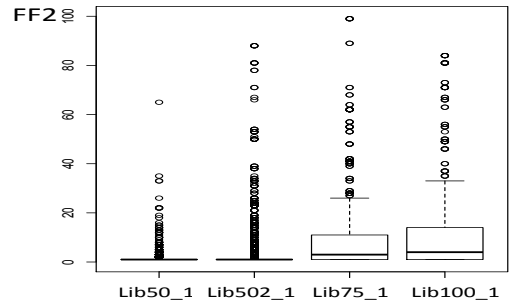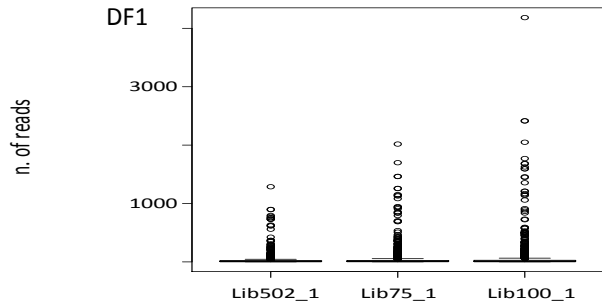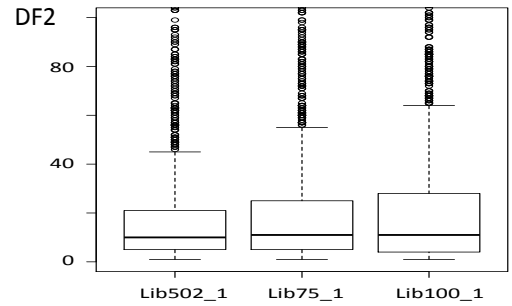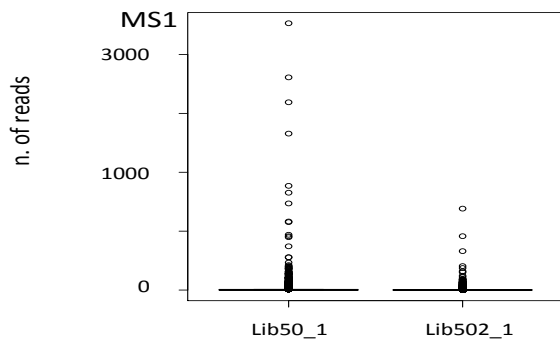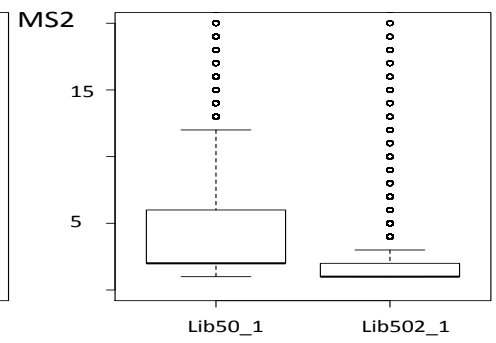

Supplement: 12859_2013_5812_MOESM1_ESM.pdf [file 12859_2013_5812_MOESM1_ESM.pdf]
